# Supplementary material
Source: PubMed Central journal article supplement (PMC3618678)
Supplement: NIHMS168698-supplement-Sup_Fig_1.pdf [file NIHMS168698-supplement-Sup_Fig_1.pdf]

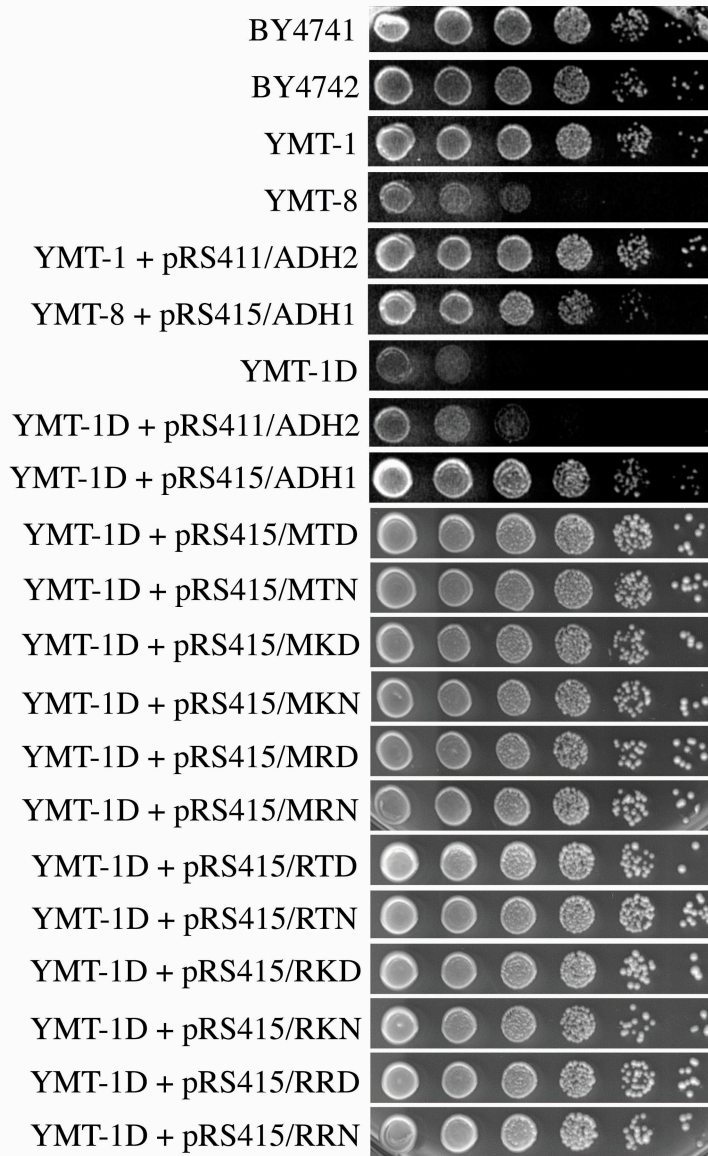

**Supplementary Figure 1** shows the complementation of Adh 1/2 double minus with ancestral proteins

**Figure 1:** Pin stamp analysis by plasmid rescue. The *adh1* (YMT-8), *adh2* (YMT-1), and *adh1/adh2* (YMT-1D) deletion strains were rescued with either *Saccharomyces cerevisiae* ADH1, ADH2, or any one of the ADH<sub>A</sub>s. Yeast were serially diluted 10 fold from left to right on 2% glucose minimal medium plates with supplements. The double deletion mutant has a phenotype exhibiting extremely slowly on glucose-containing medium, with a doubling time of over 2000 minutes.

Each of the ancestral sequences produced functional enzymes capable of rescuing the double deletion phenotype, allowing the strain to grow again on glucose as the sole carbon source. Given that a total 15 amino acid changes were made to each enzyme (12 static and 3 combinatorial), this observation reveals the robustness of the reconstruction to create active enzymes. However, this does not allow any remarks as to the catalytic or kinetic activity of the ancestor, as expression of any *adh* from the *Adh1* promoter could alleviate this growth phenotype.
